# Supplementary material
Source: publisher site journal article supplement (https://www.dovepress.com/get_supplementary_file.php?f=341287.docx)
Supplement: Supplementary file 1 [file get_supplementary_file.php]

**Supplementary table.** Investigators of the NIke Trial

| Investigator | Affiliation |
| --- | --- |
| Yuko Tsuchiya-Kawano | Department of Respiratory Medicine, Kitakyushu Municipal Medical Center, Kitakyushu, Japan. |
| Yoshimasa Shiraishi | Research Institute for Diseases of the Chest, Graduate School of Medical Sciences, Kyushu University, Fukuoka, Japan. |
| Isamu Okamoto | Research Institute for Diseases of the Chest, Graduate School of Medical Sciences, Kyushu University, Fukuoka, Japan. |
| Kazunori Tobino | Department of Respiratory Medicine, Iizuka Hospital, Fukuoka, Japan. |
| Taishi Harada | Department of Respiratory Medicine, Japan Community Healthcare Organization Kyushu Hospital, Kita-Kyushu, Japan. |
| Hidenobu Ishii | Division of Respirology, Neurology, and Rheumatology, Department of Internal Medicine, Kurume University School of Medicine, Fukuoka, Japan. |
| Keita Nakatomi | Department of Respiratory Medicine, Kyushu Chuo Hospital, Fukuoka, Japan. |
| Tatsuro Okamoto | Department of Thoracic Oncology, National Hospital Organization Kyushu Cancer Center, Fukuoka, Japan. |
| Masaki Fujita | Department of Respiratory Medicine, Fukuoka University Hospital, Fukuoka, Japan. |
| Hiroshi Ishii | Department of Respiratory Medicine, Fukuoka University Chikushi Hospital, Chikushino, Japan |
| Naoko Aragane | Division of Hematology, Respiratory Medicine and Oncology, Department of Internal Medicine, Saga University, Saga, Japan. |
| Akitoshi Kinoshita | Department of Respiratory Medicine, Nagasaki Prefecture Shimabara Hospital, Shimabara, Japan. |
| Hiroyuki Yamaguchi | Department of Respiratory Medicine, Nagasaki University Graduate School of Biomedical Sciences, Nagasaki, Japan. |
| Takuro Sakagami | Department of Respiratory Medicine, Graduate School of Medical Sciences, Kumamoto University, Kumamoto, Japan. |
| Yoshihiko Sakata | Division of Respiratory Medicine, Saiseikai Kumamoto Hospital, Kumamoto, Japan. |
| Ryotaro Morinaga | Department of Thoracic Medical Oncology, Oita Prefectural Hospital, Oita, Japan. |
| Keiko Mizuno | Department of Pulmonary Medicine, Kagoshima University Hospital, Kagoshima, Japan. |
| Kenji Chibana | Department of Respiratory Medicine, National Hospital Organization, Okinawa National Hospital, Okinawa, Japan. |
| Tadaaki Yamada | Department of Pulmonary Medicine, Graduate School of Medical Science, Kyoto Prefectural University of Medicine, Kyoto, Japan. |
| Yoichi Nakamura | Department of Respiratory Medicine, Tochigi Cancer Center, Utsunomiya, Japan. |
| Hirotaka Matsumoto | Department of Respiratory Medicine, Hyogo Prefectural Amagasaki General Medical Center, Amagasaki, Japan. |
| Satoshi Ikeda | Department of Respiratory Medicine, Kanagawa Cardiovascular and Respiratory Center, Yokohama, Japan. |
| Motoko Tachihara | Division of Respiratory Medicine, Department of Internal Medicine, Kobe University Graduate School of Medicine, Kobe, Japan |
| Akito Hata | Department of Medical Oncology, Kobe Minimally Invasive Cancer Center, Kobe, Japan. |
| Tomohiro Sakamoto | Division of Respiratory Medicine and Rheumatology, Department of Multidisciplinary Internal Medicine, Tottori University, Tottori, Japan. |
| Fumihiro Tanaka | Second Department of Surgery (Chest Surgery), University of Occupational and Environmental Health Japan, Kitakyushu, Japan. |
| Ryota Saito | Department of Respiratory Medicine, Tohoku University Hospital, Sendai, Japan. |
| Kosuke Kashiwabara | Department of Respiratory Medicine, Kumamoto Regional Medical Center, Kumamoto, Japan |
